# Supplementary material for: Molecular Markers for Detecting Inflorescence Size of Brassica oleracea L. Crops and B. oleracea Complex Species (n = 9) Useful for Breeding of Broccoli (B. oleracea var. italica) and Cauliflower (B. oleracea var. botrytis)
Source: MDPI journal article supplement (doi:10.3390/plants12020407), 2023-01-15
Supplement: s1 [file s1]

**Table S1A.** Allelic variants matrix showing the homozygous (2), heterozygous (1) and the absence (0) of the allele for the examined *loci*.

| Accession | P1_155 | P1_156 | P1_164 | P2_153 | P2_157 | P2_162 | P2_165 | P2_168 | P3_180 | P3_184 | P3_186 | P3_190 | P3_192 | P3_194 | P4_282 | P4_288 | P4_291 | P5_294 | P5_304 | P5_308 |
|-----------|--------|--------|--------|--------|--------|--------|--------|--------|--------|--------|--------|--------|--------|--------|--------|--------|--------|--------|--------|--------|
| CVF1.1    | 1      | 1      | 0      | 0      | 0      | 2      | 0      | 0      | 0      | 0      | 0      | 0      | 2      | 0      | 0      | 0      | 0      | 0      | 1      | 1      |
| CV1       | 1      | 1      | 0      | 0      | 0      | 0      | 2      | 0      | 0      | 0      | 0      | 2      | 0      | 0      | 0      | 2      | 0      | 0      | 0      | 2      |
| CV4       | 1      | 1      | 0      | 0      | 0      | 0      | 1      | 0      | 0      | 0      | 0      | 0      | 2      | 1      | 0      | 2      | 0      | 0      | 1      | 1      |
| CI1       | 1      | 1      | 0      | 0      | 0      | 0      | 1      | 0      | 0      | 0      | 0      | 2      | 0      | 0      | 0      | 2      | 0      | 0      | 0      | 2      |
| CVF1.2    | 1      | 1      | 0      | 0      | 0      | 2      | 0      | 0      | 0      | 0      | 0      | 0      | 1      | 1      | 0      | 2      | 0      | 0      | 1      | 0      |
| CV5       | 1      | 1      | 0      | 0      | 0      | 0      | 2      | 0      | 0      | 0      | 0      | 0      | 0      | 1      | 0      | 2      | 0      | 0      | 1      | 1      |
| CV6       | 1      | 1      | 0      | 0      | 0      | 0      | 2      | 0      | 0      | 0      | 0      | 0      | 2      | 0      | 1      | 0      | 0      | 0      | 0      | 2      |
| CV7       | 1      | 1      | 0      | 0      | 0      | 1      | 1      | 0      | 0      | 0      | 0      | 1      | 1      | 1      | 0      | 2      | 0      | 0      | 0      | 2      |
| CVF1.3    | 1      | 1      | 0      | 0      | 0      | 0      | 1      | 0      | 0      | 0      | 0      | 0      | 1      | 0      | 0      | 2      | 0      | 0      | 0      | 2      |
| CV8       | 1      | 1      | 0      | 0      | 0      | 1      | 1      | 0      | 0      | 0      | 0      | 2      | 2      | 1      | 0      | 2      | 0      | 0      | 0      | 2      |
| CVF1.4    | 1      | 1      | 0      | 0      | 0      | 2      | 0      | 0      | 0      | 0      | 0      | 0      | 1      | 1      | 0      | 2      | 0      | 0      | 1      | 1      |
| CVF1.5    | 2      | 0      | 0      | 0      | 0      | 2      | 0      | 0      | 0      | 0      | 0      | 0      | 0      | 2      | 0      | 2      | 0      | 0      | 0      | 2      |
| CV9       | 2      | 0      | 0      | 0      | 0      | 0      | 1      | 0      | 0      | 0      | 0      | 0      | 2      | 0      | 0      | 2      | 0      | 0      | 1      | 1      |
| CV10      | 1      | 0      | 0      | 0      | 0      | 0      | 0      | 0      | 0      | 0      | 0      | 0      | 2      | 0      | 0      | 1      | 1      | 0      | 0      | 2      |
| CVF1.6    | 1      | 1      | 0      | 0      | 0      | 0      | 1      | 0      | 0      | 0      | 0      | 2      | 0      | 0      | 0      | 2      | 0      | 0      | 0      | 2      |
| BRF1.1    | 1      | 1      | 0      | 0      | 0      | 2      | 0      | 0      | 0      | 0      | 0      | 0      | 1      | 0      | 0      | 1      | 0      | 0      | 0      | 2      |
| BR        | 1      | 1      | 0      | 0      | 0      | 2      | 0      | 0      | 0      | 0      | 0      | 0      | 1      | 1      | 1      | 1      | 0      | 0      | 0      | 2      |
| CVF1.7    | 0      | 2      | 0      | 0      | 0      | 1      | 1      | 0      | 0      | 0      | 2      | 0      | 2      | 0      | 0      | 2      | 0      | 0      | 1      | 2      |
| CV11      | 1      | 1      | 0      | 0      | 0      | 0      | 1      | 0      | 0      | 0      | 0      | 0      | 2      | 0      | 0      | 2      | 0      | 0      | 0      | 2      |
| BR1       | 1      | 1      | 0      | 0      | 0      | 2      | 0      | 0      | 0      | 0      | 0      | 0      | 2      | 0      | 0      | 2      | 0      | 0      | 1      | 1      |
| BR2       | 1      | 1      | 0      | 0      | 0      | 2      | 0      | 0      | 0      | 0      | 2      | 0      | 0      | 0      | 0      | 1      | 1      | 0      | 2      | 0      |
| CV2       | 1      | 0      | 0      | 0      | 0      | 0      | 2      | 0      | 0      | 0      | 0      | 2      | 0      | 0      | 0      | 2      | 0      | 0      | 0      | 2      |
| BR3       | 0      | 2      | 0      | 0      | 0      | 0      | 0      | 0      | 0      | 0      | 0      | 0      | 2      | 0      | 1      | 0      | 1      | 0      | 0      | 2      |
| BR4       | 1      | 1      | 0      | 0      | 0      | 0      | 1      | 0      | 0      | 0      | 0      | 0      | 2      | 0      | 0      | 1      | 1      | 0      | 0      | 2      |
| BRF1.2    | 1      | 1      | 0      | 0      | 0      | 2      | 0      | 0      | 0      | 0      | 0      | 0      | 0      | 1      | 0      | 2      | 0      | 0      | 0      | 2      |
| BR5       | 1      | 1      | 0      | 0      | 0      | 2      | 0      | 0      | 0      | 0      | 0      | 1      | 1      | 0      | 0      | 2      | 0      | 0      | 0      | 2      |
| CV3       | 1      | 1      | 0      | 0      | 0      | 2      | 0      | 0      | 0      | 0      | 0      | 0      | 2      | 0      | 0      | 2      | 0      | 0      | 0      | 2      |
| BR6       | 0      | 1      | 0      | 0      | 0      | 1      | 1      | 0      | 1      | 0      | 0      | 0      | 1      | 0      | 0      | 2      | 0      | 0      | 0      | 2      |
| BR7       | 0      | 2      | 0      | 0      | 0      | 2      | 0      | 0      | 0      | 0      | 1      | 0      | 0      | 0      | 0      | 1      | 1      | 0      | 0      | 1      |
| BR8       | 0      | 2      | 0      | 0      | 0      | 2      | 0      | 0      | 0      | 0      | 0      | 2      | 0      | 0      | 0      | 1      | 1      | 0      | 0      | 2      |
| BR9       | 0      | 1      | 0      | 1      | 0      | 1      | 0      | 0      | 0      | 0      | 0      | 0      | 0      | 0      | 0      | 0      | 2      | 0      | 1      | 1      |
| BU1       | 0      | 0      | 0      | 0      | 2      | 0      | 0      | 0      | 0      | 2      | 0      | 0      | 0      | 0      | 1      | 0      | 1      | 2      | 0      | 0      |
| BU2       | 0      | 0      | 0      | 0      | 1      | 0      | 0      | 0      | 0      | 0      | 0      | 0      | 0      | 0      | 0      | 0      | 0      | 0      | 0      | 0      |
| BY1       | 1      | 1      | 0      | 0      | 0      | 2      | 0      | 0      | 0      | 2      | 0      | 0      | 0      | 0      | 0      | 0      | 2      | 1      | 0      | 0      |
| BM        | 0      | 1      | 0      | 0      | 0      | 0      | 0      | 1      | 0      | 0      | 1      | 0      | 0      | 0      | 0      | 0      | 1      | 0      | 0      | 0      |
| BU3       | 0      | 0      | 0      | 0      | 2      | 0      | 0      | 0      | 0      | 0      | 0      | 0      | 0      | 0      | 2      | 0      | 0      | 2      | 0      | 0      |
| BU4       | 1      | 1      | 0      | 1      | 0      | 1      | 1      | 0      | 1      | 2      | 2      | 0      | 0      | 0      | 1      | 1      | 1      | 0      | 0      | 2      |
| BY2       | 0      | 2      | 0      | 0      | 0      | 2      | 0      | 0      | 0      | 2      | 0      | 0      | 0      | 0      | 0      | 2      | 0      | 0      | 0      | 0      |
| BV        | 0      | 1      | 0      | 0      | 0      | 1      | 0      | 0      | 0      | 0      | 0      | 0      | 0      | 0      | 1      | 0      | 0      | 0      | 0      | 0      |
